# Supplementary material for: Ultrasonicated Lespedeza cuneata extract prevents TNF-α-induced early atherosclerosis in vitro and in vivo
Source: Royal Society of Chemistry journal article supplement (doi:10.1039/c7fo01666b), 2018-01-01
Supplement: c7fo01666b2.pdf [file c7fo01666b2.pdf]

- 1 **Supplementary Fig. 1** Effects of ULCE on HUVEC viability. Cell viability was measured by
- 2 MTS assay as described in the Materials and Methods.
- 3 **Supplementary Table 1** Functional effects of *L. cuneata* extraction by ultrasonication
- 4 treatment times.
- 5
