# Supplementary material for: Ultrasonicated Lespedeza cuneata extract prevents TNF-α-induced early atherosclerosis in vitro and in vivo
Source: Royal Society of Chemistry journal article supplement (doi:10.1039/c7fo01666b), 2018-01-01
Supplement: c7fo01666b3.pdf [file c7fo01666b3.pdf]

**Supplementary Table 1.** Functional effects of *L. cuneate* extraction by ultrasonicated treatment times.

| Functionality                                  | Extraction time<br>(Hours) |        |
|------------------------------------------------|----------------------------|--------|
|                                                | 2                          | 3      |
| Yield (%)                                      | 9.00                       | 8.25   |
| NF- $\kappa$ B transactivity<br>(Inhibition %) | 63.89                      | 65.39  |
| NO production<br>(Inhibition %)                | 43.01                      | 43.70  |
| MMP-1 transactivity<br>(Inhibition %)          | 10.77                      | -52.39 |
