# Supplementary figures and images for: Ultrasonicated Lespedeza cuneata extract prevents TNF-α-induced early atherosclerosis in vitro and in vivo
Source: Royal Society of Chemistry journal article supplement (doi:10.1039/c7fo01666b), 2018-01-01

# Supplementary Figure 1

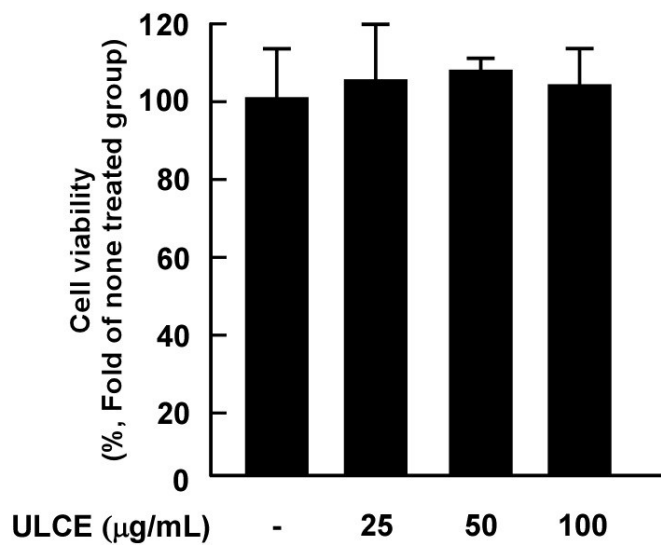

Supplement: c7fo01666b1.pdf [file c7fo01666b1.pdf]
